# Supplementary material for: Association of serum adiponectin and leptin levels with inner retinal thickness among individuals with or without elevated HbA1c
Source: bioRxiv or medRxiv preprint supplement (doi:10.1101/2024.07.01.24309679), 2024-07-03
Supplement: Supplementary file [file media-1.pdf]

**Supplementary Tables**

**Supplementary Table 1:** Adjusted regression analyses of associations of SBP and serum HbA1c, cholesterol, BUN/Cr ratio, ketone, RAGE and NEFA levels with NFL thickness across all ETDRS regions within control and prediabetes/type 2DM groups, and differential associations between groups.

| EDTRS subfield | Control                               |         | Prediabetes/type 2DM                  |               | Difference between prediabetes/type 2DM versus control |         |
|----------------|---------------------------------------|---------|---------------------------------------|---------------|--------------------------------------------------------|---------|
|                | Coefficient (95% Confidence Interval) | p value | Coefficient (95% Confidence Interval) | p value       | Coefficient (95% Confidence Interval)                  | p value |
| <b>SBP</b>     |                                       |         |                                       |               |                                                        |         |
| <b>CSF</b>     | 0.020 (-0.030-0.071)                  | 0.430   | -0.035 (-0.088-0.018)                 | 0.200         | -0.055 (-0.128-0.017)                                  | 0.137   |
| <b>SI</b>      | 0.011 (-0.037-0.060)                  | 0.658   | -0.026 (-0.079-0.025)                 | 0.318         | -0.037 (-0.108-0.033)                                  | 0.297   |
| <b>SO</b>      | 0.010 (-0.078-0.100)                  | 0.813   | -0.033 (-0.127-0.059)                 | 0.480         | -0.044 (-0.172-0.083)                                  | 0.496   |
| <b>NI</b>      | -0.006 (-0.074-0.062)                 | 0.860   | -0.061 (-0.135-0.126)                 | 0.104         | -0.055 (-0.154-0.044)                                  | 0.277   |
| <b>NO</b>      | 0.007 (-0.123-0.137)                  | 0.916   | -0.037 (-0.176-0.102)                 | 0.600         | -0.044 (-0.233-0.144)                                  | 0.645   |
| <b>II</b>      | 0.009 (-0.064-0.084)                  | 0.795   | -0.025 (-0.102-0.051)                 | 0.512         | -0.035 (-0.141-0.070)                                  | 0.510   |
| <b>IO</b>      | 0.033 (-0.087-0.153)                  | 0.590   | -0.012 (-0.137-0.111)                 | 0.839         | -0.046 (-0.217-0.125)                                  | 0.599   |
| <b>TI</b>      | 0.005 (-0.027-0.038)                  | 0.728   | -0.008 (-0.044-0.026)                 | 0.622         | -0.014 (-0.062-0.033)                                  | 0.546   |
| <b>TO</b>      | 0.0031 (-0.028-0.035)                 | 0.847   | -0.039 (-0.073-0.005)                 | <b>0.024*</b> | -0.042 (-0.089-0.003)                                  | 0.072   |
| <b>HbA1c</b>   |                                       |         |                                       |               |                                                        |         |
| <b>CSF</b>     | -1.441 (-6.863-3.980)                 | 0.602   | 0.162 (-0.735-1.059)                  | 0.723         | 1.603 (-3.907-7.114)                                   | 0.569   |
| <b>SI</b>      | -0.195 (-5.315-4.924)                 | 0.940   | -0.012 (-0.884-0.859)                 | 0.978         | 0.182 (-5.023-5.389)                                   | 0.945   |
| <b>SO</b>      | -7.257 (-15.851-1.336)                | 0.098   | 0.608 (-0.881-2.098)                  | 0.424         | 7.866 (-0.878-16.610)                                  | 0.078   |
| <b>NI</b>      | 1.363 (-6.033-8.761)                  | 0.718   | 0.168 (-1.127-1.464)                  | 0.799         | -1.195 (-8.727-6.337)                                  | 0.756   |
| <b>NO</b>      | -2.936 (-16.204-10.331)               | 0.664   | -0.295 (-2.639-2.048)                 | 0.805         | 2.641 (-10.872-16.154)                                 | 0.702   |
| <b>II</b>      | 2.570 (-4.969-10.109)                 | 0.504   | 0.074 (-1.205-1.354)                  | 0.909         | -2.495 (-10.161-5.169)                                 | 0.523   |
| <b>IO</b>      | -4.902 (-1.871-7.065)                 | 0.422   | 0.327 (-1.721-2.375)                  | 0.754         | 5.230 (-6.941-17.402)                                  | 0.400   |
| <b>TI</b>      | 2.003 (-1.370-5.377)                  | 0.244   | 0.029 -0.542-0.600)                   | 0.921         | -1.974 (-5.405-1.455)                                  | 0.259   |
| <b>TO</b>      | 1.315 (-2.229-4.860)                  | 0.467   | 0.235 (-0.367-0.837)                  | 0.444         | -1.080 (-4.684-2.524)                                  | 0.557   |

| <b>Cholesterol</b> | Coefficient<br>(95% Confidence Interval) | p value       | Coefficient<br>(95% Confidence Interval) | p value | Coefficient<br>(95% Confidence Interval) | p value       |
|--------------------|------------------------------------------|---------------|------------------------------------------|---------|------------------------------------------|---------------|
| <b>CSF</b>         | 0.016 (-0.019-0.051)                     | 0.371         | 0.021 (-.019-0.062)                      | 0.305   | 0.005 (-0.046-0.057)                     | 0.841         |
| <b>SI</b>          | 0.002 (-0.31-0.036)                      | 0.875         | 0.015 (-0.026-0.056)                     | 0.473   | 0.012 (-0.039-0.063)                     | 0.640         |
| <b>SO</b>          | -0.071 (-0.128-0.015)                    | 0.013         | -0.014 (-0.082-0.053)                    | 0.681   | 0.057 (-0.027-0.142)                     | 0.187         |
| <b>NI</b>          | 0.008 (-0.041-0.058)                     | 0.734         | 0.000 (-0.058-0.060)                     | 0.982   | -0.007 (-0.082-0.066)                    | 0.834         |
| <b>NO</b>          | -0.034 (-0.123-0.053)                    | 0.443         | -0.017 (-0.124-0.088)                    | 0.743   | 0.016 (-0.115-0.149)                     | 0.803         |
| <b>II</b>          | -0.013 (-0.064-0.037)                    | 0.595         | -0.001 (-0.061-0.058)                    | 0.967   | 0.012 (-0.062-0.088)                     | 0.745         |
| <b>IO</b>          | -0.067 (-0.146-0.011)                    | 0.094         | -0.003 (-0.096-0.089)                    | 0.941   | 0.063 (-0.053-0.181)                     | 0.286         |
| <b>TI</b>          | 0.008 (-0.013-0.312)                     | 0.444         | 0.008 (-0.018-0.035)                     | 0.528   | -0.000 (-0.033-0.033)                    | 0.995         |
| <b>TO</b>          | -0.004 (-0.027-0.019)                    | 0.732         | 0.001 (-0.026-0.030)                     | 0.912   | -0.005 (-0.029-0.041)                    | 0.752         |
| <b>BUN/Cr</b>      | Coefficient<br>(95% Confidence Interval) | p value       | Coefficient<br>(95% Confidence Interval) | p value | Coefficient<br>(95% Confidence Interval) | p value       |
| <b>CSF</b>         | -0.104 (-0.457-0.249)                    | 0.564         | 0.201 (-0.049-0.452)                     | 0.115   | 0.305 (-0.113-0.724)                     | 0.153         |
| <b>SI</b>          | 0.156 (-0.179-0.492)                     | 0.362         | 0.009 (-0.230-0.248)                     | 0.940   | -0.147 (-0.545-0.251)                    | 0.469         |
| <b>SO</b>          | 1.074 (0.560-1.588)                      | <b>0.000*</b> | -0.056 (-0.425-0.311)                    | 0.763   | -1.131 (-1.741- -0.521)                  | <b>0.000*</b> |
| <b>NI</b>          | -0.121 (-0.619-0.375)                    | 0.631         | 0.192 (-0.158-0.543)                     | 0.282   | 0.314 (-0.271-0.900)                     | 0.293         |
| <b>NO</b>          | 0.181 (-0.726-1.089)                     | 0.696         | 0.245 (-0.399-0.890)                     | 0.455   | 0.643 (-1.006-1.135)                     | 0.906         |
| <b>II</b>          | -0.319 (-0.833-0.193)                    | 0.222         | 0.566 (-0.308-0.422)                     | 0.761   | 0.376 (-0.231-0.984)                     | 0.225         |
| <b>IO</b>          | 0.518 (-0.298-1.334)                     | 0.213         | 0.225 (-0.358-0.808)                     | 0.449   | -0.293 (-1.259-0.673)                    | 0.553         |
| <b>TI</b>          | -0.125 (-0.350-0.100)                    | 0.277         | 0.035 (-0.124-0.196)                     | 0.660   | 0.160 (-0.106-0.428)                     | 0.237         |
| <b>TO</b>          | 0.001 (-0.240-0.243)                     | 0.989         | -0.014 (-0.187-0.157)                    | 0.865   | -0.016 (-0.303-0.270)                    | 0.910         |
| <b>Ketone</b>      | Coefficient<br>(95% Confidence Interval) | p value       | Coefficient<br>(95% Confidence Interval) | p value | Coefficient<br>(95% Confidence Interval) | p value       |
| <b>CSF</b>         | -3.691 (-7.287- -0.095)                  | <b>0.044*</b> | 3.394 (-16.020-22.809)                   | 0.732   | 7.096 (-12.769-26.941)                   | 0.484         |
| <b>SI</b>          | 0.951 (-2.474-4.378)                     | 0.586         | -12.654 (-31.225-5.915)                  | 0.182   | -13.606 (-32.602-5.388)                  | 0.160         |
| <b>SO</b>          | -1.225 (-7.584-5.133)                    | 0.706         | -25.698 (-60.014-8.618)                  | 0.142   | -24.472 (-59.562-10.617)                 | 0.172         |
| <b>NI</b>          | 0.704 (-4.488-5.898)                     | 0.790         | -3.581 (-32.622-25.459)                  | 0.809   | -4.286 (-33.908-25.335)                  | 0.777         |
| <b>NO</b>          | 0.0359 (-8.883-9.602)                    | 0.939         | -33.733 (-85.409-17.941)                 | 0.201   | -34.093 (-86.796-18.609)                 | 0.205         |

|             |                                       |         |                                       |         |                                       |         |
|-------------|---------------------------------------|---------|---------------------------------------|---------|---------------------------------------|---------|
| <b>II</b>   | 1.025 (-4.364-6.415)                  | 0.709   | -10.483 (-39.452-18.485)              | 0.478   | -11.509 (-41.131-18.113)              | 0.446   |
| <b>IO</b>   | -0.912 (-9.386-7.560)                 | 0.833   | -38.117 (-83.665-7.430)               | 0.101   | -37.204 (-83.778-9.368)               | 0.117   |
| <b>TI</b>   | 0.051 (-2.311-2.413)                  | 0.966   | -2.071 (-14.880-10.738)               | 0.751   | -2.122 (-15.224-10.980)               | 0.751   |
| <b>TO</b>   | 0.009 (-2.414-2.433)                  | 0.994   | -10.447 (-23.582-2.688)               | 0.119   | -10.456 (-23.892-2.979)               | 0.127   |
| <b>RAGE</b> | Coefficient (95% Confidence Interval) | p value | Coefficient (95% Confidence Interval) | p value | Coefficient (95% Confidence Interval) | p value |
| <b>CSF</b>  | 0.099 (-0.369-0.568)                  | 0.677   | -0.071 (-0.224-0.081)                 | 0.359   | -0.171 (-0.666-0.324)                 | 0.498   |
| <b>SI</b>   | 0.039 (-0.406-0.486)                  | 0.861   | 0.025 (-0.122-0.174)                  | 0.731   | -0.013 (-0.486-0.458)                 | 0.954   |
| <b>SO</b>   | -0.432 (-1.207-0.341)                 | 0.273   | 0.012 (-0.249-0.274)                  | 0.927   | 0.445 (-0.376-1.266)                  | 0.288   |
| <b>NI</b>   | 0.339 (-0.296-0.975)                  | 0.295   | -0.011 (-0.223-0.199)                 | 0.912   | -0.351 (-1.024-0.321)                 | 0.306   |
| <b>NO</b>   | 0.267 (-0.884-1.420)                  | 0.649   | 0.773 (-0.309-0.464)                  | 0.695   | -0.190 (-1.411-1.030)                 | 0.760   |
| <b>II</b>   | 0.251 (-0.401-0.903)                  | 0.450   | -0.064 (-0.282-0.154)                 | 0.565   | -0.315 (-1.006-0.375)                 | 0.371   |
| <b>IO</b>   | 0.159 (-0.894-1.213)                  | 0.767   | 0.025 (-0.329-0.380)                  | 0.888   | -0.134 (-1.251-0.983)                 | 0.814   |
| <b>TI</b>   | 0.097 (-0.192-0.388)                  | 0.510   | -0.049 (-0.145-0.045)                 | 0.306   | -0.147 (-0.455-0.159)                 | 0.346   |
| <b>TO</b>   | 0.069 (-0.237-0.376)                  | 0.658   | -0.053 (-0.155-0.048)                 | 0.302   | -0.123 (-0.448-0.202)                 | 0.458   |
| <b>NEFA</b> | Coefficient (95% Confidence Interval) | p value | Coefficient (95% Confidence Interval) | p value | Coefficient (95% Confidence Interval) | p value |
| <b>CSF</b>  | -2.224 (-8.826-4.377)                 | 0.509   | -0.621 (-4.707-3.463)                 | 0.765   | 1.602 (-6.213-9.418)                  | 0.688   |
| <b>SI</b>   | -5.292 (-11.308-0.722)                | 0.085   | -2.110 (-5.840-1.618)                 | 0.267   | 3.182 (-3.944-10.308)                 | 0.381   |
| <b>SO</b>   | -9.293 (-20.083-1.496)                | 0.091   | -4.347 (-11.103-2.408)                | 0.207   | 4.945 (-7.850-17.741)                 | 0.449   |
| <b>NI</b>   | -2.534 (-11.568-6.500)                | 0.582   | -2.115 (-7.725-3.494)                 | 0.460   | 0.418 (-10.256-11.094)                | 0.939   |
| <b>NO</b>   | -7.861 (-23.883-8.159)                | 0.336   | -6.679 (-16.664-3.304)                | 0.190   | 1.182 (-17.759-20.123)                | 0.903   |
| <b>II</b>   | -3.551 (-12.926-5.822)                | 0.458   | -1.519 (-7.362-4.324)                 | 0.610   | 2.032 (-9.068-13.134)                 | 0.720   |
| <b>IO</b>   | -8.385 (-22.901-6.129)                | 0.258   | -7.535 (-16.602-1.532)                | 0.103   | 0.850 (-16.345-18.046)                | 0.923   |
| <b>TI</b>   | -0.575 (-4.731-3.581)                 | 0.786   | 0.622 (-1.950-3.195)                  | 0.635   | 1.197 (-3.725-6.120)                  | 0.633   |
| <b>TO</b>   | -1.923 (-6.230-2.383)                 | 0.381   | -1.526 (-4.196-1.144)                 | 0.263   | 0.397 (-4.705-5.499)                  | 0.879   |

Values reported as regression coefficient (95% confidence interval).

Asterisk indicates statistical significance.

Abbreviations: NFL, nerve fiber layer; SI, superior inner; SO, superior outer; NI, nasal inner; NO, nasal outer; II, inferior inner; IO, inferior outer; TI, temporal inner; TO, temporal outer; SBP, systolic blood pressure; HbA1c, glycated hemoglobin; BUN/Cr, blood urea nitrogen/creatinine; RAGE, receptor for advanced glycation end products; NEFA, non-esterified fatty acids

**Supplementary Table 2:** Adjusted regression analyses of associations of SBP and serum HbA1c, cholesterol, BUN/Cr ratio, ketone, RAGE and NEFA levels with GCL-IPL thickness across all ETDRS regions within control and prediabetes/type 2DM groups, and differential associations between groups.

| EDTRS subfield | Control                               |         | Prediabetes/type 2DM                  |         | Difference between prediabetes/type 2DM versus control |         |
|----------------|---------------------------------------|---------|---------------------------------------|---------|--------------------------------------------------------|---------|
|                | Coefficient (95% Confidence Interval) | p value | Coefficient (95% Confidence Interval) | p value | Coefficient (95% Confidence Interval)                  | p value |
| <b>SBP</b>     |                                       |         |                                       |         |                                                        |         |
| <b>CSF</b>     | -0.022 (-0.200-0.156)                 | 0.808   | -0.124 (-0.308-0.597)                 | 0.185   | -0.102 (-0.356-0.151)                                  | 0.429   |
| <b>SI</b>      | 0.020 (-0.127-0.168)                  | 0.788   | 0.034 (-0.118-0.188)                  | 0.658   | 0.014 (-0.196-0.225)                                   | 0.894   |
| <b>SO</b>      | 0.026 (-0.073-0.126)                  | 0.606   | -0.030 (-0.134-0.073)                 | 0.567   | -0.056 (-0.199-0.086)                                  | 0.437   |
| <b>NI</b>      | 0.038 (-0.109-0.187)                  | 0.606   | -0.024 (-0.181-0.132)                 | 0.760   | -0.063 (-0.276-0.149)                                  | 0.560   |
| <b>NO</b>      | 0.056 (-0.060-0.173)                  | 0.344   | -0.035 (-0.157-0.086)                 | 0.569   | -0.091 (-0.259-0.086)                                  | 0.282   |
| <b>II</b>      | 0.071 (-0.084-0.228)                  | 0.366   | 0.017 (-0.143-0.178)                  | 0.832   | -0.054 (-0.276-0.167)                                  | 0.631   |
| <b>IO</b>      | 0.038 (-0.065-0.141)                  | 0.469   | -0.074 (-0.180-0.032)                 | 0.171   | -0.112 (-0.258-0.034)                                  | 0.134   |
| <b>TI</b>      | 0.071 (-0.095-0.237)                  | 0.403   | -0.023 (-0.196-0.149)                 | 0.789   | -0.094 (-0.332-0.143)                                  | 0.435   |
| <b>TO</b>      | 0.581 (-0.043-0.159)                  | 0.261   | -0.065 (-0.171-0.040)                 | 0.223   | -0.124 (-0.269-0.021)                                  | 0.094   |
| <b>HbA1c</b>   |                                       |         |                                       |         |                                                        |         |
| <b>CSF</b>     | 0.892 (-17.400-19.184)                | 0.924   | 0.326 (-2.798-3.450)                  | 0.838   | -0.566 (-19.172-18.040)                                | 0.952   |
| <b>SI</b>      | -6.355 (-20.883-8.173)                | 0.391   | 0.422 (-2.113-2.957)                  | 0.744   | 6.777 (-8.008-21.562)                                  | 0.369   |
| <b>SO</b>      | -7.073 (-16.689-2.543)                | 0.149   | 0.969 (-0.704-2.643)                  | 0.256   | 8.042 (-1.742-17.828)                                  | 0.107   |
| <b>NI</b>      | -1.972 (-16.860-12.915)               | 0.795   | -0.421 (-3.076-2.233)                 | 0.756   | 1.551 (-13.618-16.720)                                 | 0.841   |
| <b>NO</b>      | -10.438 (-21.641-0.764)               | 0.068   | 0.913 (1.096-2.923)                   | 0.373   | 11.352 (0.065-22.769)                                  | 0.051   |
| <b>II</b>      | 0.829 (-15.012-16.671)                | 0.918   | 0.011 (-2.682-2.706)                  | 0.993   | -0.817 (-16.925-15.289)                                | 0.921   |
| <b>IO</b>      | -8.466 (-18.548-1.615)                | 0.100   | 1.236 (-0.481-2.953)                  | 0.158   | 9.702 (-18.548-1.615)                                  | 0.064   |
| <b>TI</b>      | 1.156 (-15.447-17.761)                | 0.891   | 0.590 (-2.301-3.482)                  | 0.689   | -0.566 (-17.463-16.330)                                | 0.948   |
| <b>TO</b>      | -1.086 (-11.448-9.274)                | 0.837   | 0.780 (-1.016-2.577)                  | 0.394   | 1.867 (-8.674-12.410)                                  | 0.728   |

| <b>Cholesterol</b> | Coefficient<br>(95% Confidence Interval) | p value | Coefficient<br>(95% Confidence Interval) | p value | Coefficient<br>(95% Confidence Interval) | p value |
|--------------------|------------------------------------------|---------|------------------------------------------|---------|------------------------------------------|---------|
| <b>CSF</b>         | 0.066 (-0.055-0.187)                     | 0.285   | 0.051 (-0.091-0.195)                     | 0.480   | -0.014 (-0.195-0.166)                    | 0.876   |
| <b>SI</b>          | -0.061 (-0.159-0.035)                    | 0.215   | 0.021 (-0.096-0.139)                     | 0.719   | 0.083 (-0.063-0.230)                     | 0.267   |
| <b>SO</b>          | -0.050 (-0.116-0.015)                    | 0.131   | -0.037 (-0.116-0.041)                    | 0.352   | 0.013 (-0.085-0.111)                     | 0.797   |
| <b>NI</b>          | -0.049 (-0.148-0.049)                    | 0.329   | 0.051 (-0.068-0.170)                     | 0.400   | 0.100 (-0.048-0.249)                     | 0.186   |
| <b>NO</b>          | -0.070 (-0.147-0.005)                    | 0.069   | -0.040 (-0.132-0.052)                    | 0.393   | 0.030 (-0.084-0.146)                     | 0.604   |
| <b>II</b>          | -0.042 (-0.148-0.063)                    | 0.435   | 0.023 (-0.101-0.148)                     | 0.712   | 0.065 (-0.091-0.222)                     | 0.413   |
| <b>IO</b>          | -0.017 (-0.088-0.530)                    | 0.627   | -0.050 (-0.134-0.032)                    | 0.234   | -0.033 (-0.138-0.071)                    | 0.536   |
| <b>TI</b>          | 0.012 (-0.100-0.125)                     | 0.829   | 0.014 (-0.121-0.150)                     | 0.837   | 0.001 (-0.168-0.171)                     | 0.983   |
| <b>TO</b>          | -0.032 (-0.102-0.036)                    | 0.356   | -0.035 (-0.119-0.047)                    | 0.402   | -0.003 (-0.107-0.101)                    | 0.954   |
| <b>BUN/Cr</b>      | Coefficient<br>(95% Confidence Interval) | p value | Coefficient<br>(95% Confidence Interval) | p value | Coefficient<br>(95% Confidence Interval) | p value |
| <b>CSF</b>         | -0.361 (-1.599-0.876)                    | 0.567   | 0.485 (-0.402-1.373)                     | 0.283   | 0.847 (-0.622-2.316)                     | 0.259   |
| <b>SI</b>          | 0.136 (-0.880-1.154)                     | 0.792   | -0.175 (-0.910-0.558)                    | 0.640   | -0.312 (-1.521-0.896)                    | 0.613   |
| <b>SO</b>          | 0.211 (-0.472-0.895)                     | 0.544   | -0.191 (-0.684-0.301)                    | 0.446   | -0.403 (-1.216-0.408)                    | 0.330   |
| <b>NI</b>          | -0.158 (-1.188-0.871)                    | 0.763   | -0.173 (-0.910-0.562)                    | 0.643   | -0.15 (-1.232-1.202)                     | 0.981   |
| <b>NO</b>          | 0.448 (-0.338-1.236)                     | 0.264   | -0.338 (-0.904-0.226)                    | 0.240   | -0.787 (-1.720-0.144)                    | 0.098   |
| <b>II</b>          | 0.059 (-1.023-1.141)                     | 0.915   | -0.283 (-1.054-0.487)                    | 0.471   | -0.342 (-1.623-0.938)                    | 0.915   |
| <b>IO</b>          | 0.637 (-0.064-1.338)                     | 0.075   | -0.127 (-0.628-0.372)                    | 0.616   | -0.765 (-1.595-0.064)                    | 0.071   |
| <b>TI</b>          | -0.370 (-1.522-0.780)                    | 0.528   | -0.188 (-1.019-0.641)                    | -0.656  | 0.182 (-1.185-1.550)                     | 0.794   |
| <b>TO</b>          | 0.286 (-0.426-0.998)                     | 0.431   | -0.150 (-0.662-0.361)                    | 0.565   | -0.436 (-1.282-0.409)                    | 0.312   |
| <b>Ketone</b>      | Coefficient<br>(95% Confidence Interval) | p value | Coefficient<br>(95% Confidence Interval) | p value | Coefficient<br>(95% Confidence Interval) | p value |
| <b>CSF</b>         | -10.186 (-22.921-2.547)                  | 0.117   | 24.951 (-43.682-93.584)                  | 0.476   | 35.137 (-35.038-105.314)                 | 0.326   |
| <b>SI</b>          | -0.373 (-11.118-10.371)                  | 0.946   | 12.793 (-70.721-45.133)                  | 0.665   | -12.420 (-71.647-46.807)                 | 0.681   |
| <b>SO</b>          | -2.297 (-9.367-4.772)                    | 0.524   | -27.547 (-65.680-10.586)                 | 0.157   | -25.249 (-64.240-13.741)                 | 0.204   |
| <b>NI</b>          | -3.356 (-14.072-7.359)                   | 0.539   | -4.055 (-63.947-55.836)                  | 0.894   | -0.699 (-61.772-60.373)                  | 0.982   |
| <b>NO</b>          | -2.631 (-11.150-5.888)                   | 0.545   | -14.353 (-61.961-33.255)                 | 0.555   | -11.721 (-60.263-36.819)                 | 0.636   |

|             |                                              |                |                                              |                |                                              |                |
|-------------|----------------------------------------------|----------------|----------------------------------------------|----------------|----------------------------------------------|----------------|
| II          | -1.530 (-12.809-9.749)                       | 0.790          | -23.858 (-84.482-36.765)                     | 0.441          | -22.327 (-84.319-39.663)                     | 0.480          |
| IO          | -3.717 (-11.278-3.844)                       | 0.335          | -9.888 (-50.533-30.755)                      | 0.633          | -6.171 (-47.731-35.388)                      | 0.771          |
| TI          | -2.881 (-14.927-9.164)                       | 0.639          | -24.858 (-89.826-10.110)                     | 0.453          | -21.976 (-88.405-44.453)                     | 0.517          |
| TO          | -1.480 (-9.938-5.977)                        | 0.697          | -22.536 (-62.796-17.723)                     | 0.273          | -21.056 (-62.224-20.111)                     | 0.316          |
| <b>RAGE</b> | <b>Coefficient (95% Confidence Interval)</b> | <b>p value</b> | <b>Coefficient (95% Confidence Interval)</b> | <b>p value</b> | <b>Coefficient (95% Confidence Interval)</b> | <b>p value</b> |
| CSF         | 1.003 (-0.571-2.579)                         | 0.212          | -0.055 (-0.584-0.472)                        | 0.836          | -1.059 (-2.729-0.609)                        | 0.213          |
| SI          | -0.349 (-1.627-0.928)                        | 0.592          | -0.000 (-0.434-0.434)                        | 1.000          | 0.349 (-1.007-1.705)                         | 0.614          |
| SO          | -0.764 (-1.576-0.046)                        | 0.065          | -0.214 (-0.489-0.060)                        | 0.126          | 0.550 (-0.310-1.410)                         | 0.210          |
| NI          | -0.382 (-1.671-0.906)                        | 0.561          | 0.029 (-0.406-0.465)                         | 0.894          | 0.412 (-0.953-1.778)                         | 0.554          |
| NO          | -1.127 (-2.082-0.171)                        | <b>0.021*</b>  | -0.047 (-0.372-0.276)                        | 0.772          | 1.079 (0.066-2.092)                          | <b>0.037*</b>  |
| II          | -0.512 (-1.873-0.849)                        | 0.461          | -0.030 (-0.486-0.425)                        | 0.896          | 0.481 (-0.960-1.924)                         | 0.513          |
| IO          | -0.573 (-1.479-0.332)                        | 0.214          | -0.002 (-0.306-0.301)                        | 0.988          | 0.571 (-0.388-1.531)                         | 0.243          |
| TI          | 0.094 (-1.359-1.549)                         | 0.898          | -0.067 (-0.561-0.425)                        | 0.787          | -0.162 (-1.702-1.380)                        | 0.836          |
| TO          | -0.880 (-1.741- -0.019)                      | <b>0.045*</b>  | -0.132 (-0.423-0.157)                        | 0.369          | 0.747 (-0.165-1.660)                         | 0.109          |
| <b>NEFA</b> | <b>Coefficient (95% Confidence Interval)</b> | <b>p value</b> | <b>Coefficient (95% Confidence Interval)</b> | <b>p value</b> | <b>Coefficient (95% Confidence Interval)</b> | <b>p value</b> |
| CSF         | -13.725 (-36.185-8.735)                      | 0.231          | -3.571 (-17.602-10.459)                      | 0.618          | 10.153 (-16.469-36.776)                      | 0.455          |
| SI          | -11.867 (-29.896-6.161)                      | 0.197          | -5.603 (-16.922-5.715)                       | 0.332          | 6.264 (-15.122-27.651)                       | 0.197          |
| SO          | -9.572 (-21.833-2.688)                       | 0.126          | -1.030 (-8.721-6.660)                        | 0.793          | 8.541 (-6.002-23.085)                        | 0.250          |
| NI          | -17.508 (-35.023-0.007)                      | 0.050          | -6.136 (-17.095-4.822)                       | 0.272          | 11.371 (-9.349-32.092)                       | 0.282          |
| NO          | -15.707 (-29.677-1.738)                      | <b>0.028*</b>  | -1.834 (-10.613-6.945)                       | 0.682          | 13.873 (-2.663-30.411)                       | 0.100          |
| II          | -22.627 (-40.895-4.359)                      | 0.015          | -4.726 (-16.099-6.646)                       | 0.415          | 17.900 (-3.728-39.529)                       | 0.105          |
| IO          | -10.319 (-23.260-2.622)                      | 0.118          | 0.633 (-7.446-8.712)                         | 0.878          | 10.952 (-4.377-26.282)                       | 0.161          |
| TI          | -16.824 (-37.088)                            | 0.104          | -5.282 (-17.991-7.425)                       | 0.415          | 11.541 (-12.494-35.577)                      | 0.347          |
| TO          | -12.846 (-25.434-0.258)                      | 0.045          | -0.357 (-8.233-7.519)                        | 0.929          | 12.489 (-2.437-27.417)                       | 0.101          |

Values reported as regression coefficient (95% confidence interval).

Asterisk indicates statistical significance.

Abbreviations: GCL-IPL, ganglion cell layer-inner plexiform layer; SI, superior inner; SO, superior outer; NI, nasal inner; NO, nasal outer; II, inferior inner; IO, inferior outer; TI, temporal inner; TO, temporal outer; SBP, systolic blood pressure; HbA1c, glycated hemoglobin; BUN/Cr, blood urea nitrogen/creatinine; RAGE, receptor for advanced glycation end products; NEFA, non-esterified fatty acids
